# Supplementary material for: Effect of 30% Supramolecular Salicylic Acid Peel on Skin Microbiota and Inflammation in Patients with Moderate-to-Severe Acne Vulgaris
Source: PubMed Central journal article supplement — Dermatol Ther (Heidelb). 2022 Nov 9;13(1):155–68. doi: 10.1007/s13555-022-00844-5 (PMC9823178; doi:10.1007/s13555-022-00844-5), 2022-11-09
Supplement: 13555_2022_844_MOESM1_ESM.pdf [file 13555_2022_844_MOESM1_ESM.pdf]

Cover page

Title: Effect of 30% Supramolecular Salicylic Acid Peel on Skin Microbiota and Inflammation in Patients with Moderate-to-Severe Acne Vulgaris

Authors: Xinyi Shao<sup>1#</sup>, Yangmei Chen<sup>1#</sup>, Lingzhao Zhang<sup>1</sup>, Yujie Zhang<sup>1</sup>, Asoka Ariyawati<sup>1</sup>, Tingqiao Chen<sup>1</sup>, Jiayi Chen<sup>1</sup>, Lin Liu<sup>1</sup>, Yihuan Pu<sup>1</sup>, Yuxin Li<sup>1</sup>, Jin Chen<sup>1\*</sup>

#Xinyi Shao and Yangmei Chen contributed equally to this work.

Affiliation: 1 Department of Dermatology, the First Affiliated Hospital of Chongqing Medical University, Chongqing 400010, China

\*Corresponding author

Jin Chen, PhD

Department of Dermatology, the First Affiliated Hospital of Chongqing Medical University

No. 1 Youyi Road, Yuzhong District, Chongqing 400016, China

Tel: +86 15023188592

E-mail: [chenjin7791@163.com](mailto:chenjin7791@163.com)

Supporting Information

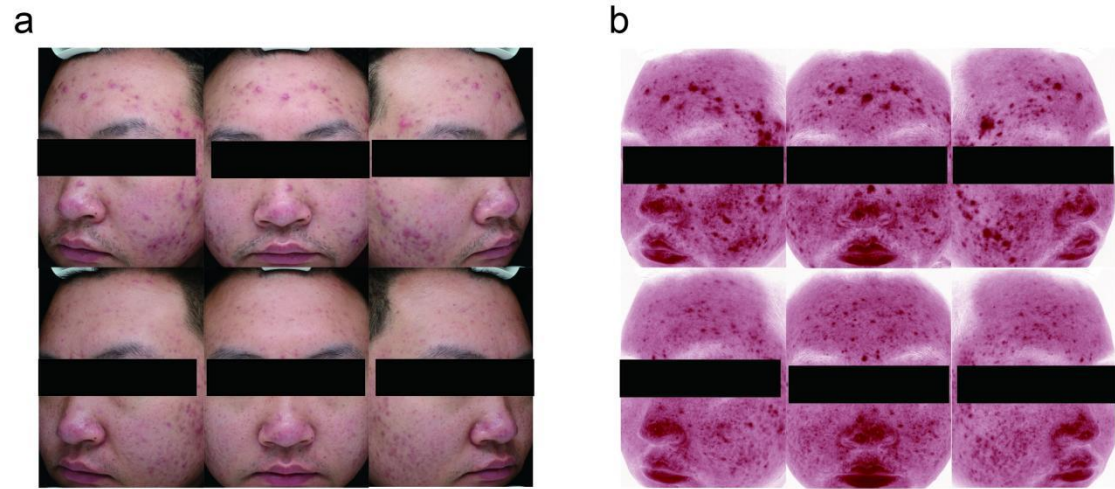

**Figure S1.** Facial images (a) and the red area (b) of a patient with grade III acne before and after 30% supramolecular salicylic acid peel treatment.
